# Supplementary material for: Chemical modification of graphene characterized by Raman and transport experiments
Source: Royal Society of Chemistry journal article supplement (doi:10.1039/c2nr30364g), 2012-01-01
Supplement: c2nr30364g.pdf [file c2nr30364g.pdf]

## Electronic Supplementary Information for

# Chemical Modification of Graphene characterized by Raman and Transport experiments

**Fabian M. Koehler,<sup>a,‡</sup> Arnhild Jacobsen,<sup>b,‡</sup> Thomas Ihn,<sup>b</sup> Klaus Ensslin<sup>b</sup> and Wendelin J.**

**Stark<sup>\*a</sup>**

<sup>a</sup> *Institute for Chemical and Bioengineering, Department of Chemistry and Applied Biosciences, ETH Zurich, 8093 Zurich, Switzerland. Fax: +41 44 633 10 83; Tel: +41 44 632 09 80;*

*E-mail: wendelin.stark@chem.ethz.ch*

<sup>b</sup> *Solid State Physics Laboratory, Department of Physics, ETH Zurich, 8093 Zurich, Switzerland.*

<sup>‡</sup> *Both authors have contributed equally to this work.*

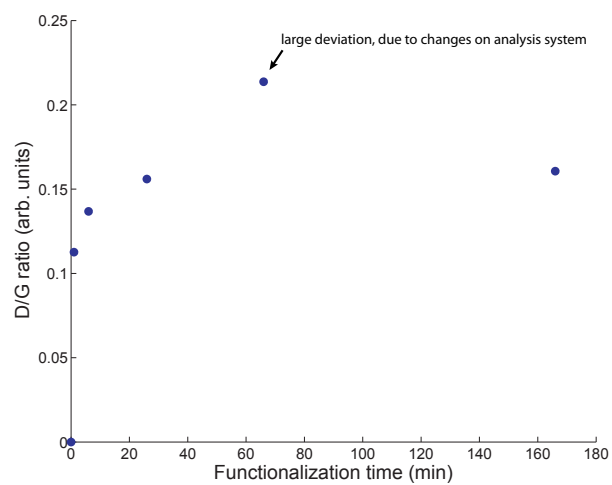

Figure S1. D/G ratio after each functionalization step.
